# Supplementary material for: Novel cytokine interactions identified during perturbed hematopoiesis
Source: bioRxiv or medRxiv preprint supplement (doi:10.1101/484170), 2018-12-22
Supplement: Supplementary file [file media-1.pdf]

## Supplementary Information: Novel cytokine interaction networks identified during perturbed hematopoiesis

Madison S. Krieger, Joshua M Moreau, Haiyu Zhang, May Chien, James L Zehnder, Martin A Nowak, and Morgan Craig

### Convergent cross-mapping

Granger causality<sup>1</sup> is an idea emerging from economics as a means to extract information from two time series beyond their (instantaneous) correlation. The original method, which was unrelated to attractors of dynamical systems, involved comparing the power spectra of two time series and constructing expressions for the *causal strength* and *causal lag* of variable A and variable B based on their respective spectra. Here the invocation of “causality” is related to the ability to forecast the state of B, given the state of A. The causal strength of A on B represents the correlation between a prediction of the state of B, only given information about A, and the actual value of B at the time point being forecasted. This is therefore a non-symmetric relationship: A may have causal strength over B while at the same time B has no causal strength over A. The causal lag represents the difference between the point in the time series of A where a forecast is being constructed for B, and the actual time point in the B time series where this forecast has the greatest causal strength. The idea of convergent cross-mapping is to extend Granger’s original construction to a new context: that of variables that are explicitly coupled in an underlying system of nonlinear differential equations with deterministic components.

If some part of the time trajectory of a system is the flow of a deterministic equation, a useful object of study is a manifold towards which the majority of initial conditions will evolve asymptotically in time (the system’s attractor). Understanding the attracting manifold  $\mathbf{M}$  requires that the attractor be properly embedded in some higher-dimensional space  $\mathbf{N}$ . If the embedding is improper (either because the derivative of the embedding map  $F : \mathbf{M} \rightarrow \mathbf{N}$  is not injective or not smooth, or fails to be a topological embedding), information about “nearness” of trajectories over time will be inaccurate and forecasting the future behaviour of the system based on the current position on the attractor will fail. Convergent cross-mapping relies on two theorems central to the embedding of attractors: Whitney’s theorem<sup>2</sup> and Takens’ theorem.<sup>3</sup> Whitney’s theorem guarantees that the maximal dimension of  $\mathbf{N}$  for which a proper embedding of  $\mathbf{M}$  will exist is  $\dim(\mathbf{N}) \leq 2 \dim(\mathbf{M})$ . To properly embed the attractor, one must find a space of proper embedding dimension in which each orthogonal subspace contains observations of the attractor,  $\mathbf{M}$ . To properly resolve the attractor, in some cases,  $\mathbf{M}$  is a sufficient number of “obvious” observation functions, whether spatial or otherwise. The insight of Takens’ theorem is to take delays of a trajectory on the attractor as independent observation functions. Given a single observation function  $\phi(t)$  for the attractor that obeys certain generic properties, an embedding can be constructed using  $\nu \equiv \dim(\mathbf{N})$  lags of (generic) length  $\tau$ , creating a  $\nu$ -dimensional vector at each time point  $t$  in the trajectory:  $(\phi(t - \tau), \phi(t - 2\tau), \dots, \phi(t - \nu\tau))$ .

The principle of convergent cross-mapping arises from the consideration of two observation functions  $\phi(t), \psi(t)$  that are somehow connected by an underlying nonlinear dynamical system. This connection is such that some information about the attractor of  $\phi(t)$  is contained in the attractor of  $\psi(t)$  (or vice-versa), or both observation functions contain some (possibly unequal) amount of information about each other. Hence the concept of Granger causality in the context of attractor cross-mapping — if the attractor underlying  $\phi(t)$  contains some information about the attractor underlying  $\psi(t)$ , thereby reflecting coupled dynamics in some nonlinear system, then to remove the information  $\phi(t)$  from the Universe would inherently diminish our ability to forecast the future of  $\psi(t)$ . The ability of  $\phi(t)$  to accurately forecast  $\psi(t)$  given the number of observations  $L$  for both observation functions is here given by a function called the cross-mapping skill  $S$  of  $\phi$  to  $\psi$ :

$$S_{\phi \rightarrow \psi}(L) \in [-1, 1], \tag{S1}$$

where generically speaking  $S_{\phi \rightarrow \psi} \neq S_{\psi \rightarrow \phi}$ . This function is constructed as follows.

1. The attractors of  $\phi(t)$  and  $\psi(t)$  are both reconstructed according to Takens' theorem with embedding dimension  $E$ . In principle,  $E$  can be as large as  $L$ , the number of observations; the optimal embedding dimension is defined simply as the value of  $E$  for which the value of the cross-mapping skill function  $S$  is maximized.
2. For each time point  $T = 1, 2, \dots, L - E$  in the delay-reconstructed manifold from  $\phi(t)$ , the nearest  $E + 1$  neighbours in the  $\mathbf{L}_2$  norm of the point corresponding to time  $T$  in the high-dimensional manifold are recorded.  $E + 1$  is the smallest requisite number of neighbours to ensure a generic  $E$ -dimensional simplex.
3. For a given point  $\phi_E(T)$ , each neighbour in this  $E + 1$  neighbour-set is assigned a weight that exponentially decreases based on its distance from  $\phi_E(T)$ .
4. These neighbours (which are each an integer between 1 and  $L$ , their index in the time series  $\phi(t)$ ) are now used to "predict" the value  $\psi(T)$ . The predicted value, called  $\psi^*(T)$ , is simply the sum of the value of  $\psi(t)$  at the neighbours' indices weighted by the weights they were assigned when they were indices for neighbours of  $\phi(T)$ .
5. The cross-mapping skill is taken to be the Pearson correlation between the predicted value of  $\psi(T)$  based on  $\phi(T)$  and the actual value:  $S_{\phi \rightarrow \psi}(L) = \rho(\psi^*(T), \psi(T))$ .

The cross-mapping is said to be convergent if the cross-mapping skill increases with increasing number of available data points,  $L$ , indicating that the predictive power of  $\phi(t)$  on  $\psi(t)$  is increasing with increasing data thus confirming that some information about the attractor of  $\phi(t)$  is reflected in the attractor of  $\psi(t)$ .

## Network properties of causal relations determined by convergent cross-mapping

Here we include several relevant measures of the network induced on cytokines by convergent cross-mapping. Note that in the theory of convergent cross-mapping, a cross-mapping with skill less than a certain threshold is not necessarily insignificant, as the strength of an interaction could be obscured by noise in measurement. The critical observation is the convergence with increasing amounts of available data,  $L$ . We impose our cutoffs arbitrarily to manage the network size, both for the purpose of visualization and computation, and also to keep only the results that tend to have the highest confidence.

We depict several important measures here graphically, as well as tabulating the cytokines with the highest scores by certain metrics. In Fig. S1 we plot the in-degree and out-degree distributions. Other critical graph-theoretic properties are tabulated in Table S1. We paid particular interest to betweenness-centrality,<sup>4</sup> highlighting cytokines that are likely to receive and then transmit information and may therefore represent important mediators in the cytokine hierarchy. The strongest nodes by this measure are also tabulated in Table S2 and mainly including interferons, growth factors, and cytokines related to necrosis. Other metrics examined included out-closeness-centrality<sup>5</sup> (Table S3), HITS authority<sup>6</sup> (Table S4), and HITS hub-ranking<sup>6</sup> (Table S5). All of these metrics attempt to gauge the importance of a node for transmitting information to others, and are therefore based on the distribution of edges between the node of interest and its neighbors, next-neighbors, etc. Each measure differs from the others based on the feature of interest — for instance, between-closeness may be said to focus on the role of a node as a mediator of information (receiving and then forwarding information from other nodes) while out-closeness might be said to focus on the role of a node as a generator or forwarder of information only. It is therefore noteworthy that some of the most important cytokines by these differing metrics are the same — for instance, VEGF appears as one of the top ten cytokines by all metrics employed.

| Property               | Value |
|------------------------|-------|
| Clustering coefficient | 0.541 |
| Average path length    | 3.437 |
| Diameter               | 7     |
| Density                | 0.124 |
| Modularity             | 0.590 |

**Table S1.** Additional graph properties of the cross-mapping network at cutoff strength  $S > 0.8$ .

| Cytokine | Scaled between-centrality |
|----------|---------------------------|
| IFNG     | 1.0000                    |
| IL18     | 0.9843                    |
| IFNA     | 0.8405                    |
| SCF      | 0.7728                    |
| CD40L    | 0.7401                    |
| IL5      | 0.6989                    |
| VEGF     | 0.5770                    |
| IL12P40  | 0.5047                    |
| TRAIL    | 0.4883                    |
| NGF      | 0.4860                    |

**Table S2.** Between-centrality ranking in the  $S > 0.8$  network.

| Cytokine | Scaled out-closeness-centrality |
|----------|---------------------------------|
| CD40L    | 1.0000                          |
| IL17F    | 0.9918                          |
| GROA     | 0.9758                          |
| MIP1A    | 0.9528                          |
| VEGF     | 0.9528                          |
| TRAIL    | 0.9453                          |
| SDF1A    | 0.9380                          |
| IL15     | 0.9380                          |
| IL1RA    | 0.9308                          |
| TGFB     | 0.9237                          |

**Table S3.** Out-closeness-centrality ranking in the  $S > 0.8$  network.

| Cytokine | Scaled authority |
|----------|------------------|
| IFNA     | 1.0000           |
| VEGF     | 0.9038           |
| IL17F    | 0.8573           |
| EGF      | 0.8149           |
| HGF      | 0.8041           |
| IL1A     | 0.7983           |
| IL17A    | 0.7971           |
| TNFA     | 0.7864           |
| IL15     | 0.7368           |
| MIP1B    | 0.7260           |

**Table S4.** HITS authority ranking in the  $S > 0.8$  network.

| Cytokine | Scaled hub factor |
|----------|-------------------|
| IL1RA    | 1.0000            |
| MIP1B    | 0.9611            |
| LIF      | 0.9565            |
| VEGF     | 0.9373            |
| IL1A     | 0.9248            |
| TNFA     | 0.9094            |
| IL15     | 0.8947            |
| GCSF     | 0.8768            |
| TGFA     | 0.8628            |
| TGFB     | 0.7518            |

**Table S5.** HITS hub ranking in the  $S > 0.8$  network.

## Comparison with the literature

In the main text, we provided a rationale for considering CCM to be at least, in part, an advance over traditional techniques for inferring interactions — whereas older approaches, such as simply measuring the Pearson correlation coefficient, give roughly 50% to 60% “accuracy” (meaning 50% to 60% of its inferred relationships can be substantiated from other experiments), CCM in this case has given nearly 80%-90% accuracy by the same metric. Here we begin to agglomerate references to the literature to support our claim. The references to pairs identified by CCM that might be less well-known in the literature are collected in Table S6.

| Cytokine 1 | Cytokine 2 | Reference | Cytokine 1 | Cytokine 2 | Reference |
|------------|------------|-----------|------------|------------|-----------|
| MIP1B      | VEGF       | [7]       | FASL       | GMCSF      | [8]       |
| TGFA       | GCSF       | [9]       | TGFA       | IL1A       | [10]      |
| IL8        | FGFB       | [11, 12]  | TGFA       | LIF        | [13]      |
| BDNF       | IL5        | [14]      | TPO        | IL7        | [15]      |
| SCF        | IL8        | [16]      | IFNG       | IL8        | [17]      |
| MCSF       | FGFB       | [18]      | IL7        | PDGFB      | [19]      |
| RANTES     | PDGFB      | [20]      | SDF1A      | CD40L      | [21]      |
| IL18       | IL31       | [22]      | IL12P40    | SCF        | [23]      |
| IL2        | RANTES     | [24]      | IL7        | RANTES     | [25]      |
| MIP1A      | IFNG       | [26]      | NGF        | IFNG       | [27]      |
| LIF        | IFNA       | [28]      | MIP1B      | IFNA       | [29]      |
| NGF        | IL9        | [30]      | IL15       | TRAIL      | [31]      |
| IL17f      | IL1A       | [32]      | MIP1B      | IL15       | [33]      |
| IL6        | FGFB       | [34]      | SCF        | FGFB       | [35]      |
| GCSF       | LIF        | [36]      | TPO        | IL2        | [37]      |
| ICAM1      | IL2        | [38]      | SCF        | IL6        | [39]      |
| FGFB       | IL6        | [40]      | IL7        | PLTs       | [41]      |
| FASL       | IFNG       | [42]      | FASL       | IL27       | [43]      |
| ICAM1      | PLTs       | [44]      | IL18       | FASL       | [45]      |
| IL1A       | IL15       | [46]      | IL1A       | IL17F      | [47]      |
| IL5        | TPO        | [48]      | RANTES     | PLTs       | [49]      |

**Table S6. Known relationships in Fig. S2 from the literature.** Fig. S2 illustrates Fig. 1 with edges re-colored according to their status in the literature. When we considered a relationship to be less well-known, we sought out corroboration in the literature, provided in the citations here.

## Difficulty for CCM in identifying causation in series versus in parallel

CCM, as a novel tool in causative analysis, is an exciting and promising avenue to extract networks of interactions from data on dynamical systems. However, it is possible for it to mis-identify relationships in certain settings. It has been demonstrated that CCM can correctly identify settings in which two variables are both strongly forced by a third, external variable.<sup>50–53</sup> However, it is possible for CCM to erroneously identify relationships as in parallel when in fact they are in serial, mitigated by other variables (see Fig. S3) — in fact, this is a common issue in causal inference, no matter the technique.<sup>54–56</sup> Since a large number of our “novel” cytokine interactions in Table 1 could easily be understood instead as strong forcings via only one intervening cytokine, along known pathways, it is very important to keep this fact in mind.

## The network induced by Pearson correlation and its accuracy

In the previous sections, we established the network of interactions found by CCM, assessed its accuracy and discussed possible mechanisms by which a number of the “novel” interactions it found could in fact be false positives. However, we still maintain that it is a major improvement upon alternative techniques. In order to support that claim, we constructed a similar network by simply keeping all cytokine pairs whose Pearson correlation exceeded 0.8 (in analogy with the CCM network in which we required the predictive strength to exceed 0.8). That network is plotted in Figure S4. Whereas roughly 10%-20% of CCM’s edges were unsubstantiated by the literature, 40%-50% of the Pearson network’s edges are unsubstantiated. Those that were found have citations in Table S7.

| Cytokines    | Reference | Cytokines    | Ref   | Cytokines    | Ref   | Cytokines    | Ref   |
|--------------|-----------|--------------|-------|--------------|-------|--------------|-------|
| IL17F-LIF    | [57]      | IL17F-IFNB   | [58]  | IL17F-TNFA   | [59]  | IL17F-MIP1B  | [60]  |
| IL17F-TGFB   | [61]      | IL17F-GCSF   | [62]  | IL17F-IL15   | [63]  | IL17F-MIG    | [64]  |
| IL17F-IL21   | [65]      | FASL-IL31    | [66]  | TGFA-IL1RA   | [67]  | TGFA-TNFA    | [67]  |
| TGFA-HGF     | [68]      | TGFA-TGFB    | †     | TGFA-EGF     | [69]  | TGFA-BDNF    | [70]  |
| TGFA-IL15    | [71]      | MIP1A-IFNB   | [72]  | MIP1A-IL1RA  | [73]  | MIP1A-TNFA   | [74]  |
| MIP1A-GCSF   | [75]      | MIP1A-IL15   | [76]  | MIP1A-MIG    | [77]  | MIP1A-IL21   | [78]  |
| MIP1A-CD40L  | [79]      | SDF1A-ICAM1  | †     | IL27-IL10    | [80]  | LIF-TNFA     | [81]  |
| LIF-HGF      | [82]      | LIF-IL15     | [83]  | LIF-CD40L    | [84]  | IL1B-IL2     | †     |
| IL4-IFNA     | [85]      | IL4-NGF      | [86]  | IL6-IL9      | [87]  | IL8-IL10     | [88]  |
| IL8-NGF      | [89]      | IL8-IL18     | [90]  | IFNB-IL1RA   | [91]  | IFNB-HGF     | [92]  |
| IFNB-EGF     | [93]      | IFNB-TRAIL   | [94]  | IFNB-MIG     | [95]  | IFNB-IL21    | [96]  |
| EOTAXIN-TNFA | [97]      | EOTAXIN-GCSF | [98]  | EOTAXIN-IL15 | [99]  | EOTAXIN-IL21 | [100] |
| IL13-SCF     | [101]     | IL1RA-HGF    | [102] | IL1RA-EGF    | [103] | IL1RA-BDNF   | [104] |
| IL1RA-TRAIL  | [105]     | IL1RA-GCSF   | [106] | IL1RA-IL15   | [107] | IL1RA-VEGF   | [108] |
| SCF-IL18     | [109]     | IFNG-NGF     | [110] | TNFA-TGFB    | [111] | TNFA-TRAIL   | †     |
| TNFA-GCSF    | [112]     | TNFA-MIG     | [113] | TNFA-IL21    | [114] | TNFA-VEGF    | [115] |
| TNFA-CD40L   | [116]     | HGF-TGFB     | [117] | HGF-GCSF     | [118] | HGF-VEGF     | [119] |
| MIP1B-TGFB   | [120]     | TGFB-BDNF    | [121] | TGFB-IL15    | [122] | VEGFD-VCAM1  | [123] |
| VEGFD-CD40L  | [124]     | EGF-GCSF     | [125] | EGF-IL15     | [126] | BDNF-GCSF    | [127] |
| TRAIL-IL21   | [128]     | TRAIL-CD40L  | [129] | GCSF-IL21    | [130] | GCSF-CD40L   | [131] |
| IL15-MIG     | [132]     | IL15-IL21    | [133] | IL15-VCAM1   | [134] | MIG-IL21     | [135] |
| MIG-CD40L    | [136]     | IL21-VCAM1   | [137] | VCAM1-CD40L  | [138] |              |       |

**Table S7. Citations for pairs identified by Pearson correlation** In order to compare the accuracy of the graphs induced by keeping pairs with CCM strength greater than 0.8 and Pearson correlation greater than 0.8, we had to construct both networks and see what fraction of edges in each were corroborated by external experiments. This table contains the citations found for less commonly-known pairs picked up by direct Pearson correlation.

## The null hypothesis for relationships between cytokines

To define a baseline “accuracy” to compare Pearson correlations and CCM, we selected 100 cytokine pairs uniformly-at-random (ignoring duplicates and pairs that were a cytokine interacting with itself) from all possible pairs, and sought out experimental literature confirming that they had an explicit effect on one another (in either direction). The pairs chosen, and references to the literature when they were corroborated, can be found in Table S8.

| Cytokines      | Ref   | Cytokines    | Ref   | Cytokines    | Ref   | Cytokines      | Ref   |
|----------------|-------|--------------|-------|--------------|-------|----------------|-------|
| RESISTIN-TRAIL | X     | FASL-SCF     | X     | TGFB-RANTES  | [139] | TRAIL-EGF      | X     |
| PLTs-PAI1      | [140] | IL2-SDF1A    | X     | IL31-IL5     | X     | HGF-IL13       | [141] |
| VEGF-IL22      | [142] | FASL-IL12P40 | [143] | IL8-RANTES   | X     | MCP1-VEGF      | [144] |
| RANTES-PAI1    | X     | IFNB-IL1A    | X     | TRAIL-TGFB   | [145] | GROA-TRAIL     | †     |
| IL4-LIF        | [146] | CD40L-IL2    | [147] | IL17F-IL9    | [148] | VCAM1-GCSF     | [149] |
| IL4-IL31       | [150] | TNFA-PAI1    | [151] | IL1B-IL21    | [152] | BDNF-IL31      | X     |
| IL5-RANTES     | †     | HGF-IL27     | X     | TNFB-IL6     | †     | IL1RA-VEGFD    | X     |
| IL7-IFNB       | X     | NGF-IL8      | [89]  | MIG-PAI1     | X     | IL12P40-IL13   | X     |
| VEGFD-SDF1A    | X     | IL22-VCAM1   | X     | MIG-IL8      | X     | TNFB-TPO       | X     |
| RANTES-EOTAXIN | X     | IL2-IL4      | X     | RANTES-MIP1A | X     | RANTES-BDNF    | [153] |
| GROA-IL1A      | X     | MIP1A-IL8    | X     | MCP3-TPO     | X     | PDGFBB-IL12P40 | X     |
| HGF-VEGFD      | [154] | IL6-GMCSF    | †     | LEPTIN-MCP1  | X     | IFNA-IL6       | X     |
| HGF-EGF        | X     | GCSF-IL1RA   | [106] | IL31-CD40L   | [155] | IL17F-VCAM1    | X     |
| FGFB-IL13      | †     | TPO-IL12P40  | X     | NGF-ICAM1    | [156] | TRAIL-IFNA     | [157] |
| PAI1-BDNF      | [158] | IFNG-MIG     | [159] | IL2-IL1RA    | X     | MIP1A-LIF      | X     |
| TGFB-TRAIL     | [160] | TGFB-IL12P70 | [161] | IL1B-IL10    | [162] | GMCSF-VCAM1    | X     |
| IFNA-VEGF      | [163] | GCSF-PLTs    | [164] | TNFB-IL1RA   | X     | IL22-PLTs      | [165] |
| GROA-TGFA      | X     | IL4-IL23     | [166] | TNFA-IL1B    | [167] | IL13-NGF       | [168] |
| BDNF-IL17F     | X     | TGFA-IL12P70 | X     | SCF-MIG      | X     | IL23-PAI1      | X     |
| SDF1A-NGF      | X     | MCSF-RANTES  | X     | MIP1A-IL8    | X     | BDNF-LEPTIN    | X     |
| IL7-GCSF       | X     | IFNB-GCSF    | X     | IL13-MCSF    | X     | TNFA-RANTES    | X     |
| TNFA-IL18      | X     | IL12P70-MCSF | X     | IL5-IL12P40  | X     | IL7-IL22       | X     |
| IL4-IFNB       | X     | MIP1A-VEGFD  | X     | GROA-MCP1    | X     | SDF1A-TRAIL    | X     |
| IL13-GCSF      | X     | LIF-IL23     | X     | MIP1B-MCSF   | X     | IL23-FGFB      | X     |
| FGFB-NGF       | X     | MCP3-VEGFD   | X     | IL4-IL7      | X     | HGF-IL2        | X     |

**Table S8. Citations for pairs identified by the random null** In order to compare the accuracy of the graphs induced by keeping pairs with CCM strength greater than 0.8 and Pearson correlation greater than 0.8, we also had to compare this with a null hypothesis in which pairs were selected completely at random. These are those pairs and all substantiating literature references, when they can be found (a mark of X indicates no such literature was found, while a mark of † indicates that this relationship was considered to be commonly known in the immunology literature). 37 of the randomly chosen pairs had some basis in fact.

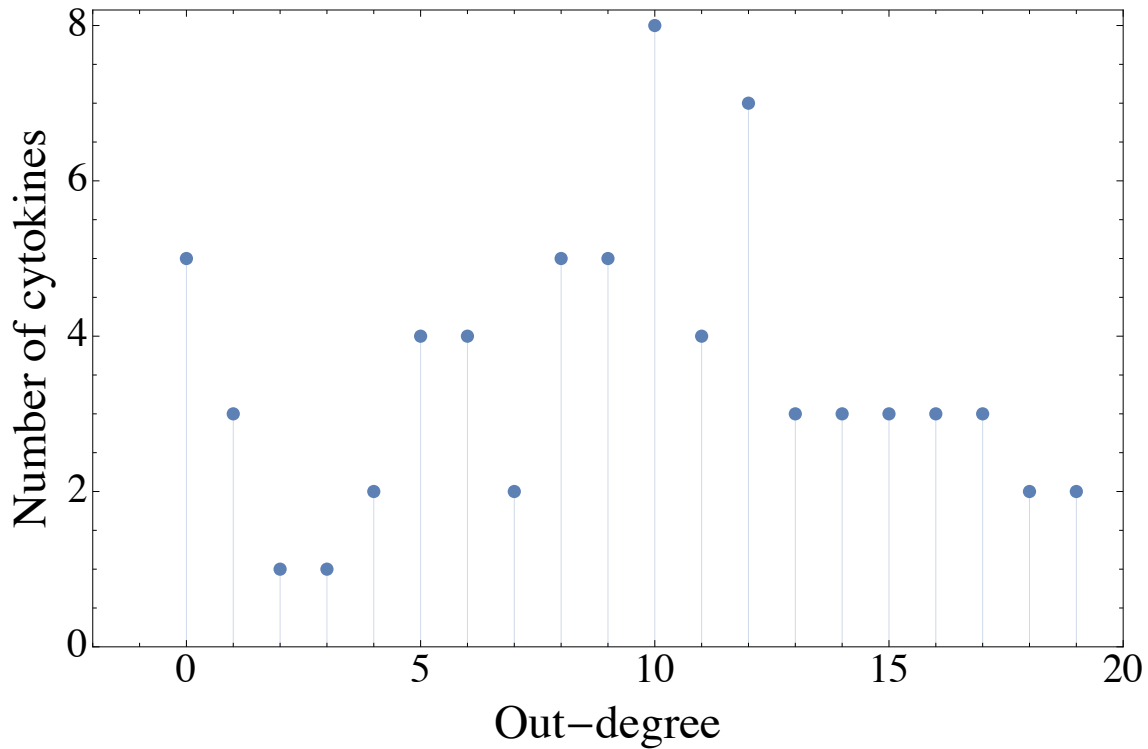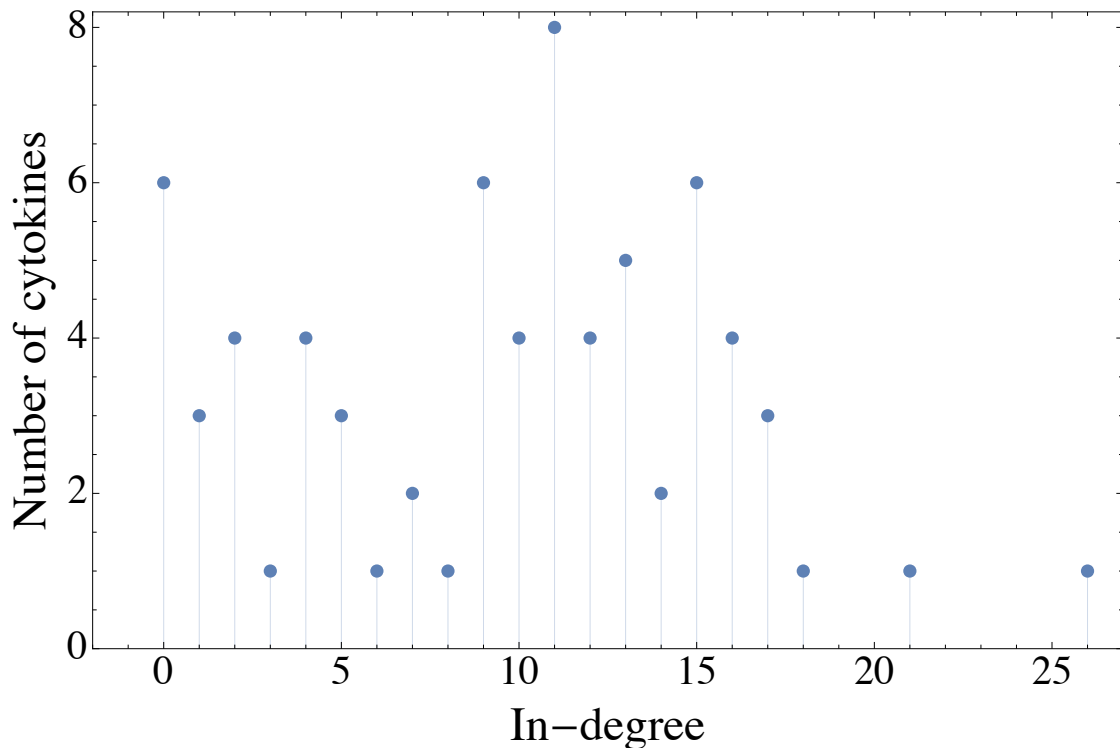

**Figure S1. Degree distributions for cytokines in network induced by convergent cross-mapping.** A larger network of cytokines induced by convergent cross-mapping which is still statistically meaningful, but difficult to visualize, is that in which all edges with maximum skill above 0.8 are maintained. Degree distributions are shown for this network. No meaningful power law is observed in the distribution.



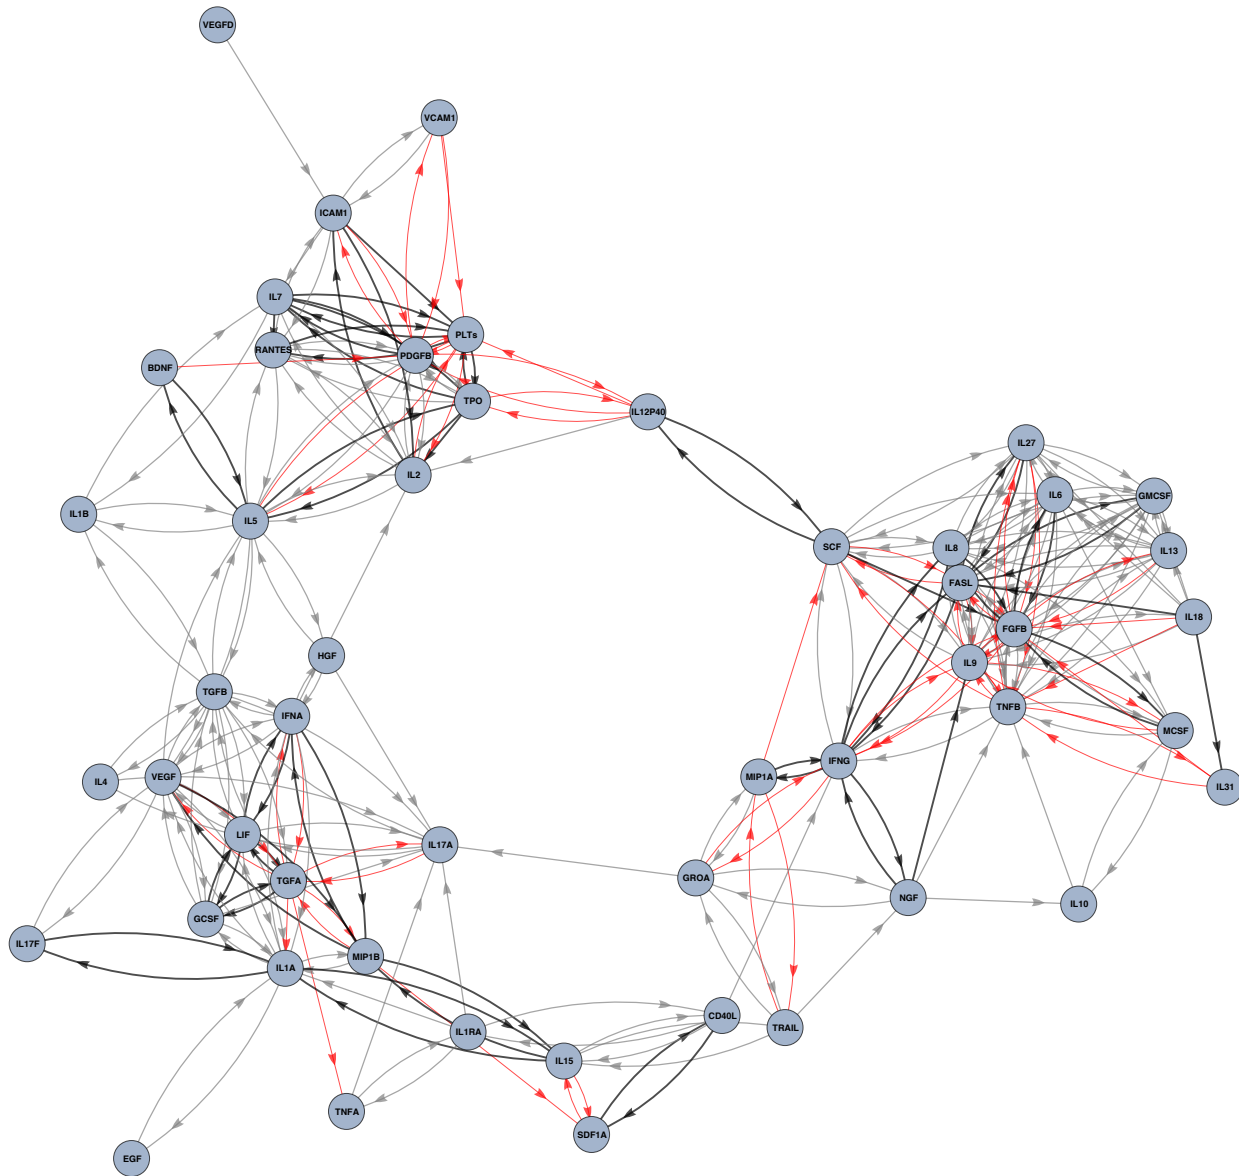

**Figure S2. What is known in the literature from Fig. 1.** This is the equivalent of Figure 1, but with edges re-colored according to their status in the literature. Gray edges indicate relationships that we considered standard, that is, the interaction is so well-known in the immunology field that no citation is needed. Black edges are supported by citations given in Table S6. Red edges indicate pairs identified by CCM for which we could find no corroborating experiments in the literature.

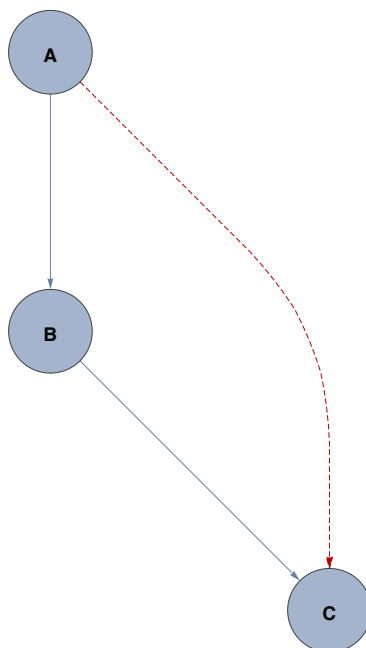

**Figure S3.** An example of spurious links identified by CCM Depending on the relative strength of interactions, CCM will either correctly ignore this edge or spuriously indicate it with positive cross-mapping.

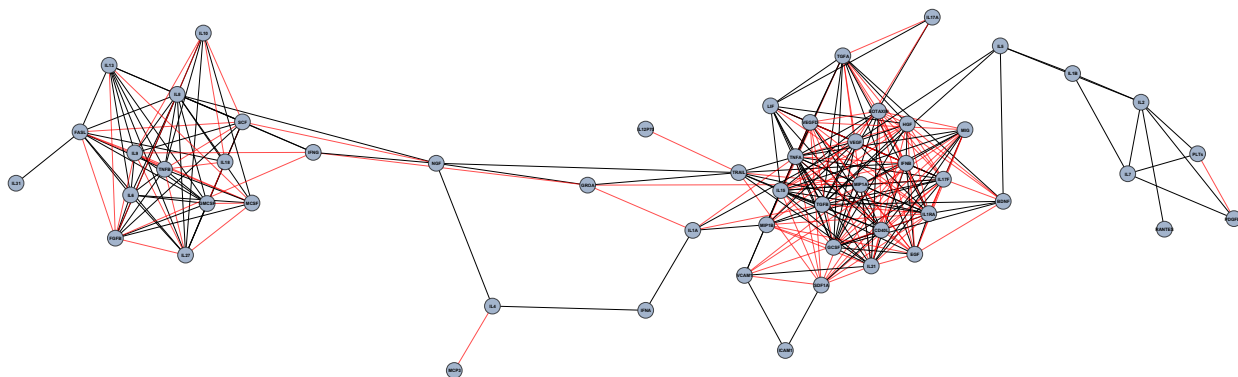

**Figure S4.** The equivalent of Figure 1 when correlation is employed Instead of drawing edges between cytokines when their CCM predictive strength at maximum library exceeds 0.8, we could do the equivalent process where an (undirected) edge is drawn between two cytokines if their Pearson correlation coefficient exceeds 0.8. While both procedures create graphs with similar numbers of edges, 57% of these edges are represented in the literature, versus the 87% of undirected edges found via CCM. Here, black edges represent known interactions from the literature, listed in Tables S6 and S7. Red edges indicate pairs for which we could find no corroborating evidence in the literature.

## References

1. C. Granger, “Investigating causal relations by econometric models and cross-spectral methods,” *Econometrica*, vol. 37, pp. 424 – 438, aug 1969.
2. J. M. Lee, *Introduction to Smooth Manifolds*. Springer, 2000.
3. F. Takens, “Detecting strange attractors in turbulence,” *Lecture Notes in Mathematics, Berlin Springer Verlag*, vol. 898, p. 366, 1981.
4. L. Freeman, “A set of measures of centrality based on betweenness,” *Sociometry*, vol. 40, pp. 35 – 41, mar 1977.
5. A. Bavelas, “Communication patterns in task-oriented groups,” *J. Acoust. Soc. Am.*, vol. 22, pp. 725 – 730, mar 1950.
6. J. M. Kleinberg, “Authoritative sources in a hyperlinked environment,” *JOURNAL OF THE ACM*, vol. 46, no. 5, pp. 604–632, 1999.
7. R. B. Bazotte, A. de Castro Ruiz Marques, M. A. R. C. P. da Silva, T. Krupek, and W. E. Filho, “Blood levels of pro-inflammatory and anti-inflammatory cytokines in a patient with a flat glucose curve,” *Acta Diabetologica*, vol. 53, no. 6, pp. 1057–1059, 2016.
8. M.-Y. Ho, G.-H. Sun, S.-J. J. Leu, S.-M. Ka, S.-J. Tang, and K.-H. Sun, “Combination of fasl and gm-csf confers synergistic antitumor immunity in an in vivo model of the murine lewis lung carcinoma,” *International Journal of Cancer*, vol. 123, no. 1, pp. 123–133, 2008.
9. M. Basson, “Growth factors and their receptors: Genetic control and rational application,” *Journal of Cellular Biochemistry*, vol. 38, no. 12A, pp. 62–179, 1990.
10. C. Uyttenhove, F. Brombacher, and J. Van Snick, “Tgf- interactions with il-1 family members trigger il-4-independent il-9 production by mouse cd4+ t cells,” *European Journal of Immunology*, vol. 40, no. 8, pp. 2230–2235, 2010.
11. D. Spillmann, D. Witt, and U. Lindahl, “Defining the interleukin-8-binding domain of heparan sulfate,” *Journal of Biological Chemistry*, vol. 273, no. 25, pp. 15487–15493, 1998.
12. D. M. Ornitz, “Fgfs, heparan sulfate and fgfrs: complex interactions essential for development,” *BioEssays*, vol. 22, no. 2, pp. 108–112, 2000.
13. X. Yue, L. Wu, and W. Hu, “The regulation of leukemia inhibitory factor,” *Cancer Cell Microenviron.*, vol. 2, no. 3, 2015.
14. L. R. Squire, *Encyclopedia of Neuroscience, vol. 1*. Academic Press, 2009.
15. F. Kimura, Y. Nakamura, K. Sato, N. Wakimoto, T. Kato, T. Tahara, M. Yamada, N. Nagata, and K. Motoyoshi, “Cyclic change of cytokines in a patient with cyclic thrombocytopenia,” *British Journal of Haematology*, vol. 94, no. 1, pp. 171–174, 1996.
16. F. Rougier, E. Cornu, V. Praloran, and Y. Denizot, “Il-6 and il-8 production by human bone marrow stromal cells,” *Cytokine*, vol. 10, no. 2, pp. 93 – 97, 1998.
17. J. E. Gudjonsson, A. Johnston, H. Sigmundsdottir, and H. Valdimarsson, “Immunopathogenic mechanisms in psoriasis,” *Clinical & Experimental Immunology*, vol. 135, no. 1, pp. 1–8, 2003.

18. A. Mantovani, S. Sozzani, M. Locati, P. Allavena, and A. Sica, "Macrophage polarization: tumor-associated macrophages as a paradigm for polarized m2 mononuclear phagocytes," *Trends in Immunology*, vol. 23, no. 11, pp. 549 – 555, 2002.
19. A. R. Venkitaraman and R. J. Cowling, "Interleukin-7 induces the association of phosphatidylinositol 3-kinase with the chain of the interleukin-7 receptor," *European Journal of Immunology*, vol. 24, no. 9, pp. 2168–2174, 1994.
20. R. Krohn, U. Raffetseder, I. Bot, A. Zernecke, E. Shagdarsuren, E. Liehn, P. van Santbrink, P. Nelson, E. Biessen, P. Mertens, and C. Weber, "Y-box binding protein-1 controls cc chemokine ligand-5 (ccl5) expression in smooth muscle cells and contributes to neointima formation in atherosclerosis-prone mice," *Circulation*, vol. 116, pp. 1812–1820, 2007.
21. R. Elgueta, M. J. Benson, V. C. De Vries, A. Wasiuk, Y. Guo, and R. J. Noelle, "Molecular mechanism and function of cd40/cd40l engagement in the immune system," *Immunological Reviews*, vol. 229, no. 1, pp. 152–172, 2009.
22. S. Kasraie, M. Niebuhr, and T. Werfel, "Interleukin (il)-31 induces pro-inflammatory cytokines in human monocytes and macrophages following stimulation with staphylococcal exotoxins," *Allergy*, vol. 65, no. 6, pp. 712–721, 2010.
23. D. I. Godfrey, J. Kennedy, M. K. Gately, J. Hakimi, B. R. Hubbard, and A. Zlotnik, "Il-12 influences intrathymic t cell development.," *The Journal of Immunology*, vol. 152, no. 6, pp. 2729–2735, 1994.
24. P. Loetscher, M. Seitz, M. Baggiolini, and B. Moser, "Interleukin-2 regulates cc chemokine receptor expression and chemotactic responsiveness in t lymphocytes.," *Journal of Experimental Medicine*, vol. 184, no. 2, pp. 569–577, 1996.
25. A. Llano, J. Barretina, A. Gutiérrez, B. Clotet, and J. Esté, "Interleukin-7-dependent production of rantes that correlates with human immunodeficiency virus disease progression," *J. Virology*, pp. 4389–4395, 2003.
26. Trumpheller, Tenner-Racz, Racz, Fleischer, and Frosch, "Expression of macrophage inflammatory protein (mip)-1, mip-1, and rantes genes in lymph nodes from hiv+ individuals: correlation with a th1-type cytokine response," *Clinical & Experimental Immunology*, vol. 112, no. 1, pp. 92–99, 1998.
27. T. Improta, A. Salvatore, A. D. Luzio, G. Romeo, E. Coccia, and P. Calissano, "Ifn- facilitates ngf-induced neuronal differentiation in pc12 cells," *Experimental Cell Research*, vol. 179, no. 1, pp. 1 – 9, 1988.
28. M. Wetzler, M. Talpaz, D. G. Lowe, G. Baiocchi, J. U. Gutterman, and R. Kurzrock, "Constitutive expression of leukemia inhibitory factor rna by human bone marrow stromal cells and modulation by il-1, tnf-alpha, and tgf-beta," *Exp Hematol.*, vol. 19, no. 5, pp. 347–351, 1991.
29. M. Kane, T. Zang, S. Rihn, F. Zhang, T. Kueck, M. Alim, J. Schoggins, C. Rice, S. Wilson, and P. Bieniasz, "Identification of interferon-stimulated genes with antiretroviral activity," *Cell Host and Microbe*, vol. 20, no. 3, pp. 392–405, 2016.
30. S. Bischoff and C. Dahinden, "Effect of nerve growth factor on the release of inflammatory mediators by mature human basophils," *Blood*, vol. 79, no. 10, pp. 2662–2669, 1992.
31. S. Oh, L. P. Perera, M. Terabe, L. Ni, T. A. Waldmann, and J. A. Berzofsky, "Il-15 as a mediator of cd4+ help for cd8+ t cell longevity and avoidance of trail-mediated apoptosis," *Proceedings of the National Academy of Sciences*, vol. 105, no. 13, pp. 5201–5206, 2008.

32. W. Tan, W. Huang, X. Gu, Q. Zhong, B. Liu, and P. Schwarzenberger, "Il-17f/il-17r interaction stimulates granulopoiesis in mice," *Experimental Hematology*, vol. 36, no. 11, pp. 1417 – 1427, 2008.
33. T. Fulop, C. Franceschi, K. Hirokawa, and G. Pawelec, *Handbook of Immunosenescence: Basic Understanding and Clinical Implications*. Springer, 2018.
34. G. Bisping, R. Leo, D. Wenning, B. Dankbar, T. Padro, M. Kropff, C. Scheffold, M. Kroeger, R. M. Mesters, W. E. Berdel, and J. Kienast, "Paracrine interactions of basic fibroblast growth factor and interleukin-6 in multiple myeloma," *Blood*, 2002.
35. J. L. Gabilove, K. White, Z. Rahman, and E. L. Wilson, "Stem cell factor and basic fibroblast growth factor are synergistic in augmenting committed myeloid progenitor cell growth.," *Blood*, vol. 83 4, pp. 907–10, 1994.
36. D. Metcalf, "Actions and interactions of g-csf, lif, and il-6 on normal and leukemic murine cells," *Leukemia*, vol. 3, p. 349355, May 1989.
37. C. M. Deane, R. T. Kroemer, and W. G. Richards, "A structural model of the human thrombopoietin receptor complex," *Journal of Molecular Graphics and Modelling*, vol. 15, no. 3, pp. 170 – 188, 1997.
38. F. A. Vyth-Dreese, T. A. M. DelleMijn, A. Frijhoff, Y. van Kooyk, and C. G. Figdor, "Role of lfa-1/icam-1 in interleukin-2-stimulated lymphocyte proliferation," *European Journal of Immunology*, vol. 23, no. 12, pp. 3292–3299, 1993.
39. Y. Ariyama, S. Misawa, and Y. Sonoda, "Synergistic effects of stem cell factor and interleukin 6 or interleukin 11 on the expansion of murine hematopoietic progenitors in liquid suspension culture," *STEM CELLS*, vol. 13, no. 4, pp. 404–413, 1995.
40. M. Korc and R. E. Friesel, "The role of fibroblast growth factors in tumor growth," *Current Cancer Drug Targets*, vol. 9, no. 5, pp. 639–651, 2009.
41. J. Damas, T. Waehre, A. Yndestad, K. Otterdal, A. Hognestad, N. Solum, L. Gullestad, S. Froeland, and P. Aukrust, "Interleukin-7-mediated inflammation in unstable angina: possible role of chemokines and platelets," *Circulation*, vol. 3, no. 107, pp. 2670–2676, 2003.
42. S. Peyvandi, S. Buart, B. Samah, M. Vétizou, Y. Zhang, L. Durrieu, M. Polrot, S. Chouaib, K. Benihoud, F. Louache, and S. Karray, "Fas ligand deficiency impairs tumor immunity by promoting an accumulation of monocytic myeloid-derived suppressor cells," *Cancer Research*, vol. 75, no. 20, pp. 4292–4301, 2015.
43. G. Kim, R. Shinnakasu, C. J. M. Saris, H. Cheroutre, and M. Kronenberg, "A novel role for il-27 in mediating the survival of activated mouse cd4 t lymphocytes," *The Journal of Immunology*, vol. 190, no. 4, pp. 1510–1518, 2013.
44. T. Bombeli, B. R. Schwartz, and J. M. Harlan, "Adhesion of activated platelets to endothelial cells: Evidence for a gpiibiiia-dependent bridging mechanism and novel roles for endothelial intercellular adhesion molecule 1 (icam-1), v3 integrin, and gpib," *Journal of Experimental Medicine*, vol. 187, no. 3, pp. 329–339, 1998.
45. H. Tsutsui, N. Kayagaki, K. Kuida, H. Nakano, N. Hayashi, K. Takeda, K. Matsui, S. Kashiwamura, T. Hada, S. Akira, H. Yagita, H. Okamura, and K. Nakanishi, "Caspase-1-independent, fas/fas ligand-mediated il-18 secretion from macrophages causes acute liver injury in mice," *Immunity*, vol. 11, no. 3, pp. 359–367, 1999.

46. N. Smith, J. Hankinson, A. Simpson, P. Mowyer, and D. Denning, “A prominent role for the *il15* pathway and *il15* in susceptibility to chronic cavitary pulmonary aspergillosis,” *Clin. Microbiol. Infect.*, vol. 20, no. 8, pp. 480–488, 2014.
47. W. Tan, W. Huang, X. Gu, Q. Zhong, B. Liu, and P. Schwarzenberger, “*Il-17f/il-17r* interaction stimulates granulopoiesis in mice,” *Experimental Hematology*, vol. 36, no. 11, pp. 1417 – 1427, 2008.
48. D. Metcalf, “Lineage commitment in the progeny of murine hematopoietic preprogenitor cells: Influence of thrombopoietin and interleukin 5,” *Proceedings of the National Academy of Sciences*, vol. 95, no. 11, pp. 6408–6412, 1998.
49. B. Shenkman, A. Brill, G. Brill, O. Lider, N. Savion, and D. Varon, “Differential response of platelets to chemokines: Rantes non-competitively inhibits stimulatory effect of *sdf-1*,” *Journal of Thrombosis and Haemostasis*, vol. 2, no. 1, pp. 154–160.
50. G. Sugihara, R. May, H. Ye, C.-h. Hsieh, E. Deyle, M. Fogarty, and S. Munch, “Detecting causality in complex ecosystems,” *Science*, vol. 338, pp. 496–500, oct 2012.
51. H. Ye, E. R. Deyle, L. J. Gilarranz, and G. Sugihara, “Distinguishing time-delayed causal interactions using convergent cross mapping,” *Scientific Reports*, vol. 5, p. 14750, oct 2015.
52. A. T. Clark, H. Ye, F. Isbell, E. R. Deyle, J. Cowles, G. D. Tilman, and G. Sugihara, “Spatial convergent cross mapping to detect causal relationships from short time series,” *Ecology*, vol. 96, pp. 1174–1181, may 2015.
53. A. A. Tsonis, E. R. Deyle, H. Ye, and G. Sugihara, “Convergent cross mapping: theory and an example,” in *Advances in Nonlinear Geosciences* (A. A. Tsonis, ed.), pp. 587–600, Cham: Springer International Publishing, 2018.
54. S. L. Lauritzen and T. S. Richardson, “Chain graph models and their causal interpretation,” *J. R. Statist. Soc. B*, vol. 64, no. 3, pp. 321–361, 2002.
55. J. Pearl, “An introduction to causal inference,” *Intern. J. Biostatistics*, vol. 6, no. 2, p. 7, 2010.
56. J. Sun, D. Taylor, and E. M. Bollt, “Causal network inference by optimal causation entropy,” *SIAM J. App. Dyn. Systems*, vol. 14, no. 1, pp. 73–106, 2015.
57. Y. Yagi, A. Andoh, O. Inatomi, T. Tsujikawa, and Y. Fujiyama, “Inflammatory responses induced by interleukin-17 family members in human colonic subepithelial myofibroblasts,” *Journal of Gastroenterology*, vol. 42, no. 9, pp. 746–753, 2007.
58. Y. Tao, X. Zhang, M. Chopra, M.-J. Kim, K. R. Buch, D. Kong, J. Jin, Y. Tang, H. Zhu, V. Jewells, and S. Markovic-Plese, “The role of endogenous *ifn-* in the regulation of *th17* responses in patients with relapsing-remitting multiple sclerosis,” *The Journal of Immunology*, vol. 192, no. 12, pp. 5610–5617, 2014.
59. S. H. Chang and C. Dong, “*Il-17f*: regulation, signaling and function in inflammation,” *Cytokine*, vol. 46, pp. 7–11, Apr 2009.
60. F. McAllister, A. Henry, J. L. Kreindler, P. J. Dubin, L. Ulrich, C. Steele, J. D. Funder, J. M. Pilewski, B. M. Carreno, S. J. Goldman, J. Pirhonen, and J. K. Kolls, “Role of *il-17a*, *il-17f*, and the *il-17* receptor in regulating growth-related oncogene- and granulocyte colony-stimulating factor in bronchial epithelium: Implications for airway inflammation in cystic fibrosis,” *The Journal of Immunology*, vol. 175, no. 1, pp. 404–412, 2005.

61. Y. Wang, F. Xing, S. Ye, J. Xiao, J. Di, S. Zeng, and J. Liu, "Jagged-1 signaling suppresses the il-6 and tgf- $\beta$  treatment-induced th17 cell differentiation via the reduction of rorgt/il-17a/il-17f/il-23a/il-12rb1," *Scientific Reports*, vol. 5, pp. 8234 EP –, Feb 2015.
62. F. McAllister, A. Henry, J. L. Kreindler, P. J. Dubin, L. Ulrich, C. Steele, J. D. Finder, J. M. Pilewski, B. M. Carreno, S. J. Goldman, J. Pirhonen, and J. K. Kolls, "Role of il-17a, il-17f, and the il-17 receptor in regulating growth-related oncogene- $\alpha$  and granulocyte colony-stimulating factor in bronchial epithelium: implications for airway inflammation in cystic fibrosis," *J Immunol*, vol. 175, pp. 404–412, Jul 2005.
63. M. Kawaguchi, M. Adachi, N. Oda, F. Kokubu, and S.-K. Huang, "Il-17 cytokine family," *Journal of Allergy and Clinical Immunology*, vol. 114, pp. 1265–1273, Dec 2004.
64. Z. Jie, Y. Liang, L. Hou, C. Dong, Y. Iwakura, L. Soong, Y. Cong, and J. Sun, "Intrahepatic innate lymphoid cells secrete il-17a and il-17f that are crucial for t cell priming in viral infection," *The Journal of Immunology*, vol. 192, no. 7, pp. 3289–3300, 2014.
65. L. Wei, A. Laurence, K. M. Elias, and J. J. O'Shea, "Il-21 is produced by th17 cells and drives il-17 production in a stat3-dependent manner," *J Biol Chem*, vol. 282, pp. 34605–34610, Nov 2007.
66. L. Szymanski, A. Cios, S. Lewicki, P. Szymanski, and W. Stankiewicz, "Fas/fas $\ell$  pathway and cytokines in keratinocytes in atopic dermatitis manipulation by the electromagnetic field," *PLOS ONE*, vol. 13, pp. 1–12, 10 2018.
67. I. N. Lavrik, *Systems Biology of Apoptosis*. Springer, 2013.
68. T. Tomiya and K. Fujiwara, "Significance of the relation between hepatocyte growth factor and transforming growth factor- in hepatocyte proliferation," in *Trends in Gastroenterology and Hepatology* (N. S. Asakura H., Aoyagi Y., ed.), pp. 587–600, Springer Tokyo, 2001.
69. R. Ebner and R. Derynck, "Epidermal growth factor and transforming growth factor- $\alpha$ : differential intracellular routing and processing of ligand-receptor complexes," *Cell Regul*, vol. 2, pp. 599–612, Aug 1991.
70. H. Namba, T. Nagano, Y. Iwakura, H. Xiong, H. Jourdi, N. Takei, and H. Nawa, "Transforming growth factor  $\alpha$  attenuates the functional expression of ampa receptors in cortical gabaergic neurons," *Mol Cell Neurosci*, vol. 31, pp. 628–641, Apr 2006.
71. D. Hose, J. Moreaux, T. Meissner, A. Seckinger, H. Goldschmidt, A. Benner, K. Mahtouk, J. Hilgess, T. Rème, J. De Vos, M. Hundemer, M. Condomines, U. Bertsch, J.-F. Rossi, A. Jauch, B. Klein, and T. Möhler, "Induction of angiogenesis by normal and malignant plasma cells," *Blood*, vol. 114, no. 1, pp. 128–143, 2009.
72. M.-O. Kim, Q. Si, J. N. Zhou, R. G. Pestell, C. F. Brosnan, J. Locker, and S. C. Lee, "Interferon- $\alpha$  activates multiple signaling cascades in primary human microglia," *Journal of Neurochemistry*, vol. 81, no. 6, pp. 1361–1371.
73. H. Uchimizu, Y. Matsuwaki, M. Kato, N. Otori, and H. Kojima, "Eosinophil-derived neurotoxin, elastase, and cytokine profile in effusion from eosinophilic otitis media," *Allergology International*, vol. 64, pp. S18–S23, Sep 2015.
74. C. D. L. Ramos, C. Canetti, J. T. Souto, J. S. Silva, C. M. Hogaboam, S. H. Ferreira, and F. Q. Cunha, "Mip-1[ $\text{ccl3}$ ] acting on the ccr1 receptor mediates neutrophil migration in immune inflammation via sequential release of tnf- and ltb $_4$ ," *Journal of Leukocyte Biology*, vol. 78, no. 1, pp. 167–177.

75. T. Queto, Z. F. M. Vasconcelos, R. A. Luz, C. Anselmo, A. A. A. Guiné, P. M. R. e. Silva, J. Farache, J. M. T. Cunha, A. C. Bonomo, M. I. C. Gaspar-Elsas, and P. Xavier-Elsas, “G-csf suppresses allergic pulmonary inflammation, downmodulating cytokine, chemokine and eosinophil production,” *Life Sciences*, vol. 88, no. 19, pp. 830–838, 2011.
76. E. M. Bluman, K. J. Bartynski, B. R. Avalos, and M. A. Caligiuri, “Human natural killer cells produce abundant macrophage inflammatory protein-1 alpha in response to monocyte-derived cytokines,” *J Clin Invest*, vol. 97, pp. 2722–2727, Jun 1996.
77. M. Thapa, R. S. Welner, R. Pelayo, and D. J. J. Carr, “Cxcl9 and cxcl10 expression are critical for control of genital herpes simplex virus type 2 infection through mobilization of hsv-specific ctl and nk cells to the nervous system,” *J Immunol*, vol. 180, pp. 1098–1106, Jan 2008.
78. M. Croce, V. Rigo, and S. Ferrini, “Il-21: a pleiotropic cytokine with potential applications in oncology,” *J Immunol Res*, vol. 2015, pp. 696578–696578, 2015.
79. Y. Guo, A. M. Walsh, U. Fearon, M. D. Smith, M. D. Wechalekar, X. Yin, S. Cole, C. Orr, T. McGarry, M. Canavan, S. Kelly, T.-A. Lin, X. Liu, S. M. Proudman, D. J. Veale, C. Pitzalis, and S. Nagpal, “Cd40l-dependent pathway is active at various stages of rheumatoid arthritis disease progression,” *The Journal of Immunology*, 2017.
80. G. Murugaiyan, A. Mittal, R. Lopez-Diego, L. M. Maier, D. E. Anderson, and H. L. Weiner, “Il-27 is a key regulator of il-10 and il-17 production by human cd4+ t cells,” *J Immunol*, vol. 183, pp. 2435–2443, Aug 2009.
81. C. S. Levy, V. Slomiansky, A. Gattelli, K. Nahmod, F. Pelisch, M. Blaustein, A. Srebrow, O. A. Coso, and E. C. Kordon, “Tumor necrosis factor alpha induces lif expression through erk1/2 activation in mammary epithelial cells,” *Journal of Cellular Biochemistry*, vol. 110, no. 4, pp. 857–865.
82. M. Tomida and T. Saito, “The human hepatocyte growth factor (hgf) gene is transcriptionally activated by leukemia inhibitory factor through the stat binding element,” *Oncogene*, vol. 23, pp. 679 EP –, Dec 2003.
83. L. L. Shuya, E. M. Menkhorst, J. Yap, P. Li, N. Lane, and E. Dimitriadis, “Leukemia inhibitory factor enhances endometrial stromal cell decidualization in humans and mice,” *PLoS One*, vol. 6, pp. e25288–e25288, Sep 2011.
84. C. Van Kooten, X. Van Der Linde, A. M. Woltman, L. A. Van Es, and M. R. Daha, “Synergistic effect of interleukin-1 and cd40l on the activation of human renal tubular epithelial cells,” *Kidney International*, vol. 56, no. 1, pp. 41–51, 1999.
85. E.-Y. So, H.-H. Park, and C.-E. Lee, “Ifn- and ifn- posttranscriptionally down-regulate the il-4-induced il-4 receptor gene expression,” *The Journal of Immunology*, vol. 165, no. 10, pp. 5472–5479, 2000.
86. C. Brodie, N. Goldreich, T. Haiman, and G. Kazimirsky, “Functional il-4 receptors on mouse astrocytes: Il-4 inhibits astrocyte activation and induces ngf secretion,” *Journal of Neuroimmunology*, vol. 81, pp. 20–30, Jan 1998.
87. R. Goswami and M. H. Kaplan, “A brief history of il-9,” *J Immunol*, vol. 186, pp. 3283–3288, Mar 2011.
88. P. Méndez-Samperio, E. García, A. Vázquez, and J. Palma, “Regulation of interleukin-8 by interleukin-10 and transforming growth factor beta in human monocytes infected with mycobacterium bovis,” *Clin Diagn Lab Immunol*, vol. 9, pp. 802–807, Jul 2002.



89. G. Prencipe, G. Minnone, R. Strippoli, L. De Pasquale, S. Petrini, I. Caiello, L. Manni, F. De Benedetti, and L. Bracci-Laudiero, "Nerve growth factor downregulates inflammatory response in human monocytes through trka," *The Journal of Immunology*, vol. 192, no. 7, pp. 3345–3354, 2014.
90. J.-K. Lee, S.-H. Kim, E. C. Lewis, T. Azam, L. L. Reznikov, and C. A. Dinarello, "Differences in signaling pathways by il-1 and il-18," *Proceedings of the National Academy of Sciences*, vol. 101, no. 23, pp. 8815–8820, 2004.
91. N. Molnarfi, N. Hyka-Nouspikel, L. Gruaz, J.-M. Dayer, and D. Burger, "The production of il-1 receptor antagonist in ifn- $\gamma$ -stimulated human monocytes depends on the activation of phosphatidylinositol 3-kinase but not of stat1," *The Journal of Immunology*, vol. 174, no. 5, pp. 2974–2980, 2005.
92. N. Molnarfi, M. Benkhoucha, K. Bjarnadttir, C. Juillard, and P. H. Lalive, "Interferon induces hepatocyte growth factor in monocytes of multiple sclerosis patients," *PLOS ONE*, vol. 7, pp. 1–8, 11 2012.
93. D. Lulli, M. L. Carbone, and S. Pastore, "Epidermal growth factor receptor inhibitors trigger a type i interferon response in human skin," *Oncotarget*, vol. 7, pp. 47777–47793, Jun 2016.
94. J. A. Zula, H. C. Green, R. M. Ransohoff, R. A. Rudick, G. R. Stark, and A. H. H. van Boxel-Dezaire, "The role of cell type-specific responses in ifn- $\gamma$  therapy of multiple sclerosis," *Proceedings of the National Academy of Sciences*, vol. 108, no. 49, pp. 19689–19694, 2011.
95. A. Antonelli, S. M. Ferrari, P. Fallahi, E. Ghiri, C. Crescioli, P. Romagnani, P. Vitti, M. Serio, and E. Ferrannini, "Interferon-alpha, -beta and -gamma induce cxcl9 and cxcl10 secretion by human thyrocytes: Modulation by peroxisome proliferator-activated receptor-gamma agonists," *Cytokine*, vol. 50, no. 3, pp. 260–267, 2010.
96. Y. Tao, X. Zhang, M. Chopra, M.-J. Kim, K. R. Buch, D. Kong, J. Jin, Y. Tang, H. Zhu, V. Jewells, and S. Markovic-Plese, "The role of endogenous ifn- $\gamma$  in the regulation of th17 responses in patients with relapsing-remitting multiple sclerosis," *The Journal of Immunology*, vol. 192, no. 12, pp. 5610–5617, 2014.
97. K. F. Chung, H. J. Patel, E. J. Fadlon, J. Rousell, E. B. Haddad, P. J. Jose, J. Mitchell, and M. Belvisi, "Induction of eotaxin expression and release from human airway smooth muscle cells by il-1 $\beta$  and tnfa: effects of il-10 and corticosteroids," *Br J Pharmacol*, vol. 127, pp. 1145–1150, Jul 1999.
98. T. Queto, Z. F. M. Vasconcelos, R. A. Luz, C. Anselmo, A. A. A. Guiné, P. M. R. e. Silva, J. Farache, J. M. T. Cunha, A. C. Bonomo, M. I. C. Gaspar-Elsas, and P. Xavier-Elsas, "G-csf suppresses allergic pulmonary inflammation, downmodulating cytokine, chemokine and eosinophil production," *Life Sciences*, vol. 88, no. 19, pp. 830–838, 2011.
99. X. Zhu, M. Wang, P. Mavi, M. Rayapudi, A. K. Pandey, A. Kaul, P. E. Putnam, M. E. Rothenberg, and A. Mishra, "Interleukin-15 expression is increased in human eosinophilic esophagitis and mediates pathogenesis in mice," *Gastroenterology*, vol. 139, pp. 182–93.e7, Jul 2010.
100. Y. Takeda, T. Kato, N. Nemoto, A. Araki, M. Y. Gazi, H. Nara, and H. Asao, "Augmentation of the expression of the eotaxin receptor on duodenal neutrophils by il-21," *Cytokine*, vol. 110, pp. 194–203, 2018.
101. H. Kobayashi, Y. Okayama, T. Ishizuka, R. Pawankar, C. Ra, and M. Mori, "Production of il-13 by human lung mast cells in response to fcepsilon receptor cross-linkage," *Clin. Exp. Allergy*, vol. 28, pp. 1219–1227, Oct 1998.

102. C. Molnar, E. Garcia-Trevijano, O. Ludwiczek, D. Talabot, A. Kaser, J. Mato, G. Fritsche, G. Weiss, C. Gabay, M. Avila, and H. Tilg, "Anti-inflammatory effects of hepatocyte growth factor: induction of interleukin-1 receptor antagonist," *Eur. Cytokine Netw.*, vol. 15, no. 4, pp. 303–311, 2004.
103. M. Gupta, M. Stenson, M. O'Byrne, M. J. Maurer, T. Habermann, J. R. Cerhan, G. W. Weiner, and T. E. Witzig, "Comprehensive serum cytokine analysis identifies il-1ra and soluble il-2ra as predictors of event-free survival in t-cell lymphoma," *Ann Oncol*, vol. 27, pp. 165–172, Jan 2016.
104. G. A. Prieto, S. Snigdha, D. Baglietto-Vargas, E. D. Smith, N. C. Berchtold, L. Tong, D. Ajami, F. M. LaFerla, J. Rebek, and C. W. Cotman, "Synapse-specific il-1 receptor subunit reconfiguration augments vulnerability to il-1 in the aged hippocampus," *Proceedings of the National Academy of Sciences*, vol. 112, no. 36, pp. E5078–E5087, 2015.
105. E. Vassina, M. Leverkus, S. Yousefi, L. R. Braathen, H.-U. Simon, and D. Simon, "Increased expression and a potential anti-inflammatory role of trail in atopic dermatitis," *Journal of Investigative Dermatology*, vol. 125, no. 4, pp. 746–752, 2005.
106. M. Schwabe, A.-M. Hartert, H. Bertz, and J. Finke, "Treatment with granulocyte colony-stimulating factor increases interleukin-1 receptor antagonist levels during engraftment following allogeneic stem-cell transplantation," *European Journal of Clinical Investigation*, vol. 34, no. 11, pp. 759–765.
107. E. Jablonska, L. Piotrowski, M. Kiluk, J. Jablonski, Z. Grabowska, and W. Markiewicz, "Effect of il-15 on the secretion of il-1b, il-1ra and sil-1rii by pmn from cancer patients," *Cytokine*, vol. 16, no. 5, pp. 173–177, 2001.
108. Z. Gong, J. Ma, H. Su, T. Guo, H. Cai, Q. Chen, X. Zhao, J. Qi, and J. Du, "Interleukin-1 receptor antagonist inhibits angiogenesis in gastric cancer," *Int J Clin Oncol*, vol. 23, no. 4, pp. 659–670, 2018.
109. J. Hue, A. Kim, H. Song, I. Choi, H. Park, T. Kim, W. J. Lee, H. Kang, and D. Cho, "Il-18 enhances scf production of melanoma cells by regulating roi and p38 mapk activity," *Immunology Letters*, vol. 96, no. 2, pp. 211–217, 2005.
110. A. C. Campos, G. N. Vaz, V. M. Saito, and A. L. Teixeira, "Further evidence for the role of interferon-gamma on anxiety- and depressive-like behaviors: Involvement of hippocampal neurogenesis and ngf production," *Neuroscience Letters*, vol. 578, pp. 100–105, 2014.
111. Z. Szondy and A. Pallai, "Transmembrane tnfr-1 reverse signaling leading to tgfr-1 production is selectively activated by tnfr-1 targeting molecules: Therapeutic implications," *Pharmacological Research*, vol. 115, pp. 124–132, 2017.
112. T. Logan, W. Gooding, J. Kirkwood, and R. Shadduck, "Tumor necrosis factor administration is associated with increased endogenous production of m-csf and g-csf but not gm-csf in human cancer patients," *Exp. Hematol.*, vol. 24, no. 1, pp. 49–53, 1996.
113. A. Antonelli, M. Rotondi, S. M. Ferrari, P. Fallahi, P. Romagnani, S. S. Franceschini, M. Serio, and E. Ferrannini, "Interferon- $\gamma$ -inducible chemokine cxcl10 involvement in graves ophthalmopathy: Modulation by peroxisome proliferator-activated receptor- $\gamma$  agonists," *The Journal of Clinical Endocrinology & Metabolism*, vol. 91, no. 2, pp. 614–620, 2006.
114. V. Phan-Lai, Y. Dang, E. Gad, J. Childs, and M. L. Disis, "The antitumor efficacy of il2/il21-cultured polyfunctional neu-specific t cells is tnfr-1/il17 dependent," *Clinical Cancer Research*, 2015.

115. H.-S. Cha, E.-K. Bae, J.-H. Koh, J.-Y. Chai, C. H. Jeon, K.-S. Ahn, J. Kim, and E.-M. Koh, "Tumor necrosis factor-alpha induces vascular endothelial growth factor-c expression in rheumatoid synoviocytes.," *The Journal of Rheumatology*, vol. 34, no. 1, pp. 16–19, 2007.
116. P. Pignatelli, R. Cangemi, A. Celestini, R. Carnevale, L. Polimeni, A. Martini, D. Ferro, L. Loffredo, and F. Violi, "Tumour necrosis factor upregulates platelet cd40l in patients with heart failure," *Cardiovascular Research*, vol. 78, no. 3, pp. 515–522, 2008.
117. O. Mungunsukh and R. M. Day, "Transforming growth factor-b1 selectively inhibits hepatocyte growth factor expression via a micro-rna-199-dependent posttranscriptional mechanism," *Mol Biol Cell*, vol. 24, pp. 2088–2097, Jul 2013.
118. A. Jalili, N. Shirvaikar, S. Ilnitsky, A. R. Turner, M. Z. Ratajczak, and A. Janowska-Wieczorek, "G-csf induces expression of both hepatocyte growth factor (hgf) and its receptor (c-met) in human hematopoietic stem/progenitor cells and mature myeloid cells - novel evidence that during mobilization the hgf-c-met axis counterbalances g-csf-induced atte. . .," *Blood*, vol. 110, no. 11, pp. 2203–2203, 2007.
119. K. H. Lee and J.-R. Kim, "Hepatocyte growth factor induced up-regulations of vegf through egr-1 in hepatocellular carcinoma cells," *Clinical & Experimental Metastasis*, vol. 26, no. 7, pp. 685–692, 2009.
120. M. Terra, M. Oberkamp, C. Fayolle, P. Rosenbaum, C. Guillerey, G. Dadaglio, and C. Leclerc, "Tumor-derived tgf alters the ability of plasmacytoid dendritic cells to respond to innate immune signaling," *Cancer Research*, vol. 78, no. 11, pp. 3014–3026, 2018.
121. A. Sometani, H. Kataoka, A. Nitta, H. Fukumitsu, H. Nomoto, and S. Furukawa, "Transforming growth factor-1 enhances expression of brain-derived neurotrophic factor and its receptor, trkb, in neurons cultured from rat cerebral cortex," *Journal of Neuroscience Research*, vol. 66, no. 3, pp. 369–376.
122. M. Benahmed, B. Meresse, B. Arnulf, U. Barbe, J.-J. Mention, V. Verkarre, M. Allez, C. Cellier, O. Hermine, and N. Cerf-Bensussan, "Inhibition of tgf- $\beta$ 2 signaling by il-15: A new role for il-15 in the loss of immune homeostasis in celiac disease," *Gastroenterology*, vol. 132, pp. 994–1008, Mar 2007.
123. T. Duong, K. Koltowska, C. Pichol-Thievend, L. Le Guen, F. Fontaine, K. A. Smith, V. Truong, R. Skoczylas, S. A. Stacker, M. G. Achen, P. Koopman, B. M. Hogan, and M. Francois, "Vegfd regulates blood vascular development by modulating sox18 activity," *Blood*, vol. 123, no. 7, pp. 1102–1112, 2014.
124. S. Kiriakidis, E. Andreacos, C. Monaco, B. Foxwell, M. Feldmann, and E. Paleolog, "Vegf expression in human macrophages is nf-b-dependent: studies using adenoviruses expressing the endogenous nf-b inhibitor ib and a kinase-defective form of the ib kinase 2," *Journal of Cell Science*, 2002.
125. M. A. Ryan, K. J. Nattamai, E. Xing, D. Schleimer, D. Daria, A. Sengupta, A. Köhler, W. Liu, M. Gunzer, M. Jansen, N. Ratner, T. D. Le Cras, A. Waterstrat, G. Van Zant, J. A. Cancelas, Y. Zheng, and H. Geiger, "Pharmacological inhibition of egfr signaling enhances g-csf-induced hematopoietic stem cell mobilization," *Nat Med*, vol. 16, pp. 1141–1146, Oct 2010.
126. S. Yano, M. Komine, M. Fujimoto, H. Okochi, and K. Tamaki, "Interleukin 15 induces the signals of epidermal proliferation through erk and pi 3-kinase in a human epidermal keratinocyte cell line, hacat," *Biochemical and Biophysical Research Communications*, vol. 301, no. 4, pp. 841–847, 2003.

127. S. Song, X. Kong, S. Acosta, V. Sava, C. Borlongan, and J. Sanchez-Ramos, "Granulocyte colony-stimulating factor promotes behavioral recovery in a mouse model of traumatic brain injury," *J Neurosci Res*, vol. 94, pp. 409–423, May 2016.
128. C. J. M. Melief and S. P. Schoenberger, "Enhancement of proliferation and downregulation of trail expression on cd8+ t cells by il-21," *Eur J Immunol*, vol. 40, pp. 2990–2992, Nov 2010.
129. M. Travert, P. Ame-Thomas, T. Fest, C. Pangault, G. Semana, T. Lamy, K. Tarte, and T. Guillaudeux, "Cd40l modulates trail-induced apoptosis in germinal center derived b cell lymphomas," *Blood*, vol. 108, no. 11, pp. 4630–4630, 2006.
130. G. R. Hill, S. D. Olver, R. D. Kuns, A. Varelias, N. C. Raffelt, A. L. Don, K. A. Markey, Y. A. Wilson, M. J. Smyth, Y. Iwakura, J. Tocker, A. D. Clouston, and K. P. A. MacDonald, "Stem cell mobilization with g-csf induces type 17 differentiation and promotes scleroderma," *Blood*, vol. 116, no. 5, pp. 819–828, 2010.
131. I. Mavroudi and H. A. Papadaki, "The role of cd40/cd40 ligand interactions in bone marrow granulopoiesis," *ScientificWorldJournal*, vol. 11, pp. 2011–2019, Oct 2011.
132. A. Jayaraman, D. J. Jackson, S. D. Message, R. M. Pearson, J. Aniscenko, G. Caramori, P. Mallia, A. Papi, B. Shamji, M. Edwards, J. Westwick, T. Hansel, L. A. Stanciu, S. L. Johnston, and N. W. Bartlett, "Il-15 complexes induce nk- and t-cell responses independent of type i ifn signaling during rhinovirus infection," *Mucosal Immunol*, vol. 7, pp. 1151–1164, Sep 2014.
133. H. Nguyen and N.-p. Weng, "Il-21 preferentially enhances il-15-mediated homeostatic proliferation of human cd28+ cd8 memory t cells throughout the adult age span," *J Leukoc Biol*, vol. 87, pp. 43–49, Jan 2010.
134. G. Cui, T. Hara, S. Simmons, K. Wagatsuma, A. Abe, H. Miyachi, S. Kitano, M. Ishii, S. Tani-ichi, and K. Ikuta, "Characterization of the il-15 niche in primary and secondary lymphoid organs in vivo," *Proceedings of the National Academy of Sciences*, vol. 111, no. 5, pp. 1915–1920, 2014.
135. J.-K. Yoo and T. J. Braciale, "Il-21 promotes late activator apc-mediated t follicular helper cell differentiation in experimental pulmonary virus infection," *PLoS One*, vol. 9, pp. e105872–e105872, Sep 2014.
136. Y. Nakayama, C. C. Brinkman, and J. S. Bromberg, "Murine fibroblastic reticular cells from lymph node interact with cd4+ t cells through cd40-cd40l," *Transplantation*, vol. 99, pp. 1561–1567, Aug 2015.
137. E. Di Carlo, A. Comes, A. M. Orengo, O. Rosso, R. Meazza, P. Musiani, M. P. Colombo, and S. Ferrini, "Il-21 induces tumor rejection by specific ctl and ifn--dependent cxc chemokines in syngeneic mice," *The Journal of Immunology*, vol. 172, no. 3, pp. 1540–1547, 2004.
138. K. Kotowicz, G. L. Dixon, N. J. Klein, M. J. Peters, and R. E. Callard, "Biological function of cd40 on human endothelial cells: costimulation with cd40 ligand and interleukin-4 selectively induces expression of vascular cell adhesion molecule-1 and p-selectin resulting in preferential adhesion of lymphocytes," *Immunology*, vol. 100, pp. 441–448, Aug 2000.
139. K. Sato, H. Kawasaki, H. Nagayama, M. Enomoto, C. Morimoto, K. Tadokoro, T. Juji, and T. A. Takahashi, "Tgf-1 reciprocally controls chemotaxis of human peripheral blood monocyte-derived dendritic cells via chemokine receptors," *The Journal of Immunology*, vol. 164, no. 5, pp. 2285–2295, 2000.

140. H. Brogren, L. Karlsson, M. Andersson, L. Wang, D. Erlinge, and S. Jern, "Platelets synthesize large amounts of active plasminogen activator inhibitor 1," *Blood*, vol. 104, no. 13, pp. 3943–3948, 2004.
141. T. NAKAMURA and S. MIZUNO, "The discovery of hepatocyte growth factor (hgf) and its significance for cell biology, life sciences and clinical medicine," *Proceedings of the Japan Academy, Series B*, vol. 86, no. 6, pp. 588–610, 2010.
142. W.-Q. Shang, J.-J. Yu, L. Zhu, W.-J. Zhou, K.-K. Chang, Q. Wang, and M.-Q. Li, "Blocking il-22, a potential treatment strategy for adenomyosis by inhibiting crosstalk between vascular endothelial and endometrial stromal cells," *Am J Transl Res*, vol. 7, pp. 1782–1797, Oct 2015.
143. Z. R. Zacharias and K. L. Legge, "A unique subset of cd11c+ b cells upregulate fasl expression in response to il-12p40 during lethal dose influenza virus (iav) infections.," *The Journal of Immunology*, vol. 196, no. 1 Supplement, pp. 147.4–147.4, 2016.
144. J. Liu, P. Jha, V. V. Lyzogubov, R. G. Tytarenko, N. S. Bora, and P. S. Bora, "Relationship between complement membrane attack complex, chemokine (c-c motif) ligand 2 (ccl2) and vascular endothelial growth factor in mouse model of laser-induced choroidal neovascularization," *Journal of Biological Chemistry*, vol. 286, no. 23, pp. 20991–21001, 2011.
145. K. Herzer, T. M. Ganten, H. Schulze-Bergkamen, A. Grosse-Wilde, R. Koschny, P. H. Krammer, and H. Walczak, "Transforming growth factor can mediate apoptosis via the expression of trail in human hepatoma cells," *Hepatology*, vol. 42, no. 1, pp. 183–192.
146. P. P. C. Souza, P. Palmqvist, P. Lundberg, I. Lundgren, L. Hännström, J. A. C. Souza, H. H. Conaway, and U. H. Lerner, "Interleukin-4 and interleukin-13 inhibit the expression of leukemia inhibitory factor and interleukin-11 in fibroblasts," *Molecular Immunology*, vol. 49, no. 4, pp. 601–610, 2012.
147. C. Johnson-Léger, J. R. Christenson, M. Holman, and G. G. B. Klaus, "Evidence for a critical role for il-2 in cd40-mediated activation of naive b cells by primary cd4 t cells," *The Journal of Immunology*, vol. 161, no. 9, pp. 4618–4626, 1998.
148. E. C. Nowak, C. T. Weaver, H. Turner, S. Begum-Haque, B. Becher, B. Schreiner, A. J. Coyle, L. H. Kasper, and R. J. Noelle, "Il-9 as a mediator of th17-driven inflammatory disease," *Journal of Experimental Medicine*, vol. 206, no. 8, pp. 1653–1660, 2009.
149. B. Fuste, G. Escolar, P. Marin, R. Mazzara, A. Ordinas, and M. Diaz-Ricart, "G-csf increases the expression of vcam-1 on stromal cells promoting the adhesion of cd34<sup>+</sup> hematopoietic cells: studies under flow conditions," *Experimental Hematology*, vol. 32, pp. 765–772, Aug 2004.
150. B. Stott, P. Lavender, S. Lehmann, D. Pennino, S. Durham, and C. B. Schmidt-Weber, "Human il-31 is induced by il-4 and promotes th17-driven inflammation," *Journal of Allergy and Clinical Immunology*, vol. 132, pp. 446–454.e5, Aug 2013.
151. M. Swiatkowska, J. Szemraj, and C. S. Cierniewski, "Induction of pai-1 expression by tumor necrosis factor in endothelial cells is mediated by its responsive element located in the 4g/5g site," *The FEBS Journal*, vol. 272, no. 22, pp. 5821–5831.
152. C.-K. Wan, P. Li, R. Spolski, J. Oh, A. B. Andraski, N. Du, Z.-X. Yu, C. P. Dillon, D. R. Green, and W. J. Leonard, "Il-21-mediated non-canonical pathway for il-1b production in conventional dendritic cells," *Nature Communications*, vol. 6, pp. 7988 EP –, Aug 2015. Article.

153. H. Tokami, T. Ago, H. Sugimori, J. Kuroda, H. Awano, K. Suzuki, Y. Kiyohara, M. Kamouchi, and T. Kitazono, "Rantes has a potential to play a neuroprotective role in an autocrine/paracrine manner after ischemic stroke," *Brain Research*, vol. 1517, pp. 122–132, 2013.
154. T. Tammela and K. Alitalo, "Yet another function for hepatocyte growth factor," *Blood*, vol. 107, no. 9, pp. 3424–3425, 2006.
155. N. Rosine, A. Etcheto, H. Hendel-Chavez, R. Seror, K. Briot, A. Molto, P. Chanson, Y. Taoufik, D. Wendling, R. Lories, F. Berenbaum, R. van den Berg, P. Claudepierre, A. Feydy, M. Dougados, C. Roux, and C. Miceli-Richard, "Increase in il-31 serum levels is associated with reduced structural damage in early axial spondyloarthritis," *Scientific Reports*, vol. 8, no. 1, p. 7731, 2018.
156. S. Othumpangat, M. Regier, and G. Piedimonte, "Nerve growth factor modulates human rhinovirus infection in airway epithelial cells by controlling icam-1 expression," *Am J Physiol Lung Cell Mol Physiol*, vol. 302, pp. L1057–L1066, May 2012.
157. C. Kumar-Sinha, S. Varambally, A. Sreekumar, and A. M. Chinnaiyan, "Molecular cross-talk between the trail and interferon signaling pathways," *Journal of Biological Chemistry*, vol. 277, no. 1, pp. 575–585, 2002.
158. H. Jiang, X. Li, S. Chen, N. Lu, Y. Yue, J. Liang, Z. Zhang, and Y. Yuan, "Plasminogen activator inhibitor-1 in depression: Results from animal and clinical studies," *Scientific Reports*, vol. 6, pp. 30464 EP –, Jul 2016.
159. N. Kanda, T. Shimizu, Y. Tada, and S. Watanabe, "Il-18 enhances ifn--induced production of cxcl9, cxcl10, and cxcl11 in human keratinocytes," *European Journal of Immunology*, vol. 37, no. 2, pp. 338–350.
160. Y. Okada, T. Wang, K. Kasai, K. Suzuki, and Y. Takikawa, "Regulation of transforming growth factor is involved in the efficacy of combined 5-fluorouracil and interferon alpha-2b therapy of advanced hepatocellular carcinoma," *Cell Death Discovery*, vol. 4, no. 1, p. 42, 2018.
161. N. J. Thornburg, B. Shepherd, and J. E. Crowe, "Transforming growth factor beta is a major regulator of human neonatal immune responses following respiratory syncytial virus infection," *Journal of Virology*, vol. 84, no. 24, pp. 12895–12902, 2010.
162. K. Y. C. Kwong, C. A. Jones, R. Cayabyab, C. Lecart, N. Khuu, I. Rhandhawa, J. M. Hanley, R. Ramanathan, R. A. deLemos, and P. Minoo, "The effects of il-10 on proinflammatory cytokine expression (il-1b and il-8) in hyaline membrane disease (hmd)," *Clinical Immunology and Immunopathology*, vol. 88, no. 1, pp. 105–113, 1998.
163. Z. von Marschall, A. Scholz, T. Cramer, G. Schafer, M. Schirner, K. Oberg, B. Wiedenmann, M. Hocker, and S. Rosewicz, "Effects of interferon alpha on vascular endothelial growth factor gene transcription and tumor angiogenesis," *JNCI: Journal of the National Cancer Institute*, vol. 95, no. 6, pp. 437–448, 2003.
164. A. O. Spiel, J. Bartko, M. Schwameis, C. Firbas, J. Siller-Matula, M. Schuetz, M. Weigl, and B. Jilma, "Increased platelet aggregation and in vivo platelet activation after granulocyte colony-stimulating factor administration," *Thromb Haemost*, vol. 105, no. 04, pp. 655–662, 2011. 655.
165. S. C. Liang, C. Nickerson-Nutter, D. D. Pittman, Y. Carrier, D. G. Goodwin, K. M. Shields, A.-J. Lambert, S. H. Schelling, Q. G. Medley, H.-L. Ma, M. Collins, K. Dunussi-Joannopoulos, and L. A. Fouser, "Il-22 induces an acute-phase response," *The Journal of Immunology*, vol. 185, no. 9, pp. 5531–5538, 2010.

166. E. Guenova, Y. Skabytska, W. Hoetzenecker, G. Weindl, K. Sauer, M. Tham, K.-W. Kim, J.-H. Park, J. H. Seo, D. Ignatova, A. Cozzio, M. P. Levesque, T. Volz, M. Köberle, S. Kaesler, P. Thomas, R. Mailhammer, K. Ghoreschi, K. Schäkel, B. Amarov, M. Eichner, M. Schaller, R. A. Clark, M. Röcken, and T. Biedermann, “IL-4 abrogates t(h)17 cell-mediated inflammation by selective silencing of il-23 in antigen-presenting cells,” *Proc Natl Acad Sci U S A*, vol. 112, pp. 2163–2168, Feb 2015.
167. S. Saperstein, L. Chen, D. Oakes, G. Pryhuber, and J. Finkelstein, “IL-1beta augments tnf-alpha-mediated inflammatory responses from lung epithelial cells,” *J Interferon Cytokine Res*, vol. 29, pp. 273–284, May 2009.
168. A. Z. Sin, E. M. Roche, A. Togias, L. M. Lichtenstein, and J. T. Schroeder, “Nerve growth factor or il-3 induces more il-13 production from basophils of allergic subjects than from basophils of nonallergic subjects,” *Journal of Allergy and Clinical Immunology*, vol. 108, pp. 387–393, Sep 2001.
